# Supplementary material for: Reduced Root Cortical Tissue with an Increased Root Xylem Investment Is Associated with High Wheat Yields in Central China
Source: MDPI journal article supplement (doi:10.3390/plants13081075), 2024-04-11
Supplement: s1 [file s1]

Supplementary materials

**Table S1.** Mean yield and yield components (thousand kernel weight, number of grains per spike, and the number of spikes per m<sup>2</sup> [spike density]) of 20 winter wheat genotypes in the growing season 2020-2021 in central China. Standard error in parentheses.

| No.            | Yield (g)       | Thousand kernel weight (g) | Number of grains per spike | Spike density   |
|----------------|-----------------|----------------------------|----------------------------|-----------------|
| Tongmai6       | 704.17 (20.56)  | 36.48 (1.03)               | 41.22 (2.33)               | 480.33 (8.82)   |
| Shannong20     | 680.09 (46.11)  | 49.29 (0.97)               | 29.93 (0.57)               | 501.67 (33.29)  |
| Luohan2        | 618.52 (29.73)  | 44.52 (1.94)               | 33.93 (0.92)               | 475.00 (2.08)   |
| Yunhan20410    | 632.41 (32.47)  | 40.41 (0.30)               | 42.34 (1.98)               | 397.33 (17.38)  |
| Zhoumai18      | 644.91 (43.15)  | 36.05 (1.10)               | 39.82 (0.33)               | 475.33 (11.46)  |
| Zhongmai175    | 683.61 (25.90)  | 42.99 (0.61)               | 40.23 (0.88)               | 447.67 (17.80)  |
| Jimai22        | 689.35 (22.93)  | 39.03 (1.93)               | 37.69 (0.67)               | 522.67 (19.94)  |
| Bainongak58    | 569.45 (36.15)  | 36.91 (1.06)               | 35.61 (1.40)               | 463.67 (30.47)  |
| Lunxuan99      | 674.07 (30.07)  | 37.39 (0.60)               | 40.12 (0.50)               | 473.00 (22.05)  |
| Yumai49        | 634.72 (53.55)  | 46.92 (1.49)               | 28.99 (0.59)               | 506.67 (18.05)  |
| Yumai158       | 643.05 (41.53)  | 48.99 (0.71)               | 38.30 (0.73)               | 384.33 (17.27)  |
| Luohan12       | 623.61 (54.26)  | 39.93 (1.66)               | 36.24 (1.85)               | 469.33 (8.45)   |
| Henong7106     | 691.20 (22.14)  | 38.38 (0.28)               | 39.90 (0.21)               | 469.67 (5.70)   |
| Zhoumai26      | 653.70 (41.33)  | 39.16 (0.99)               | 40.23 (0.60)               | 443.33 (11.14)  |
| Zhengmai101    | 727.78 (51.89)  | 38.43 (0.47)               | 40.27 (1.70)               | 478.67 (30.91)  |
| Zhengmai379    | 576.85 (19.25)  | 38.65 (0.32)               | 39.07 (0.89)               | 413.67 (15.17)  |
| Zhengmai9023   | 680.09 (51.20)  | 41.28 (0.82)               | 38.67 (1.41)               | 454.00 (22.74)  |
| Bainong207     | 799.07 (5.22)   | 39.14 (0.82)               | 38.57 (1.93)               | 551.67 (27.94)  |
| Luomai9        | 748.15 (26.47)  | 39.44 (0.76)               | 40.27 (0.54)               | 503.33 (20.58)  |
| Zhoumai32      | 776.39 (38.35)  | 39.57 (1.18)               | 40.80 (0.35)               | 509.33 (16.84)  |
| <i>P</i> value | <i>P</i> < 0.05 | <i>P</i> < 0.05            | <i>P</i> < 0.05            | <i>P</i> < 0.05 |

**Table S2.** The results of path analysis of yield components in winter wheat. The three yield components all had a positively significant influence on yield ( $p<0.001$ ). Spike density had the highest coefficient among the three yield components. Grain number made a greater contribution to yield than did grain weight.

|                    | Standardized path coefficient | Significance |
|--------------------|-------------------------------|--------------|
| Spike density      | 0.641                         | $P<0.001$    |
| Grain number       | 0.599                         | $P<0.001$    |
| Grain weight (TKW) | 0.401                         | $P<0.001$    |

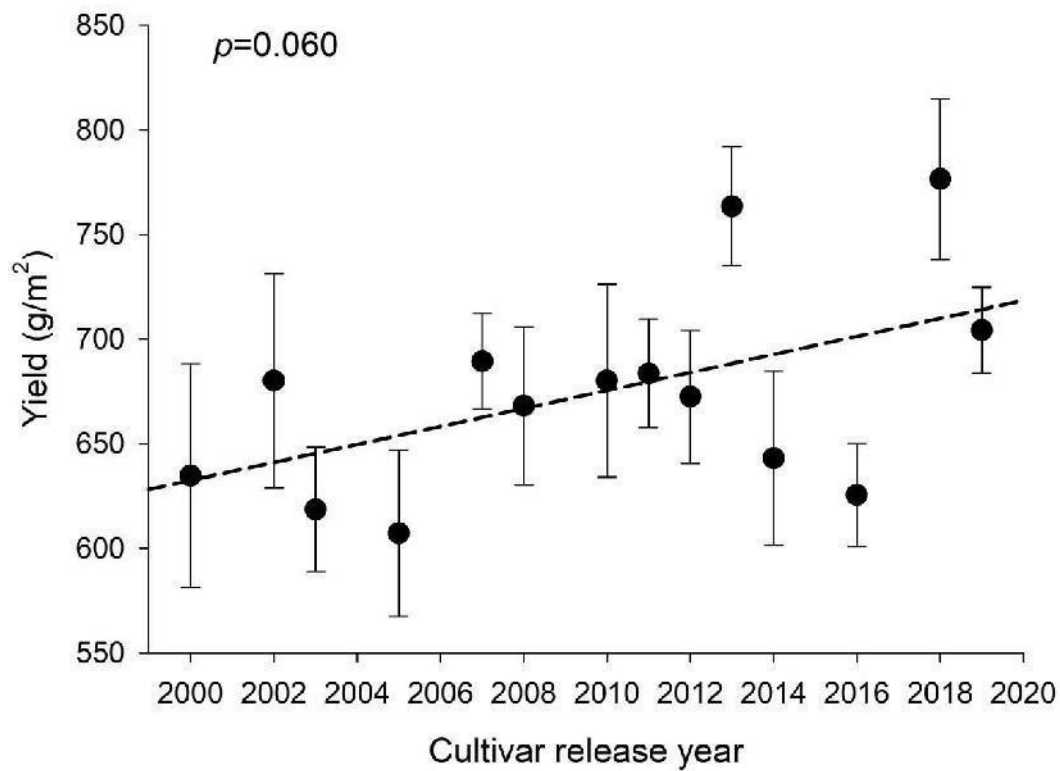

**Figure S1.** Relationship between yield and year of release. When more than one cultivar was released in the same year, all are included in the average.

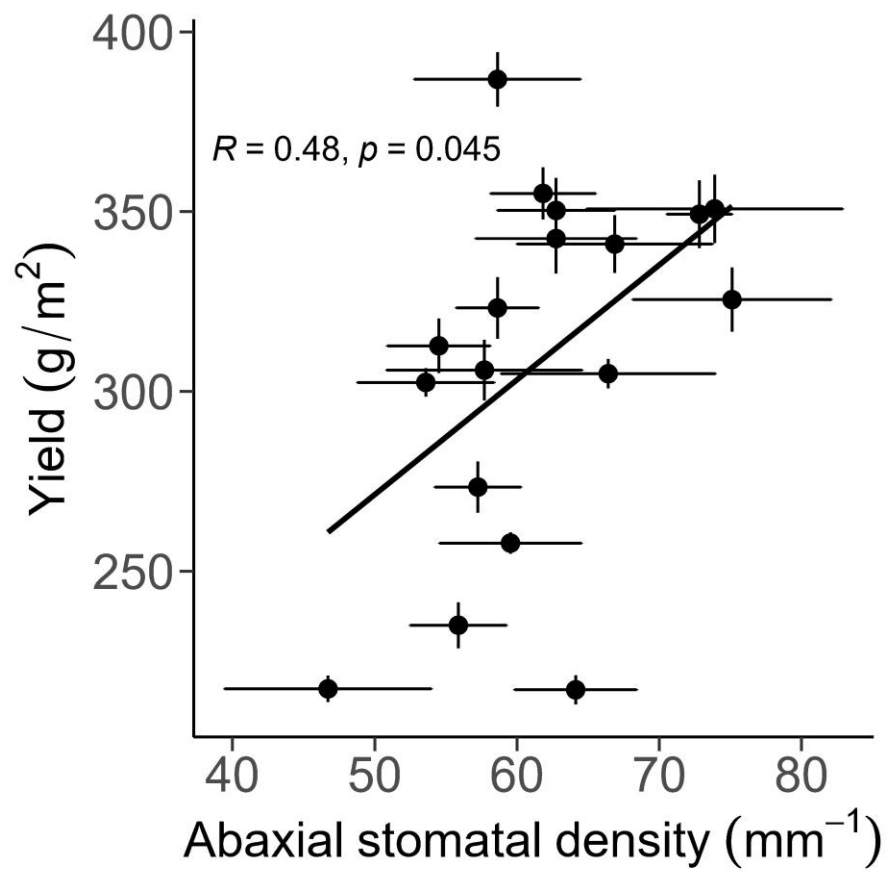

**Figure S2.** Relationships between yield and abaxial stomatal density in wheat in a field study in Zhuanglang, Gansu, China (P. Du, unpublished).
